# Supplementary material for: A metal-free, eco-friendly protocol for the oxidative halogenation of aromatic compounds by using highly efficient and reusable graphene oxide
Source: Royal Society of Chemistry journal article supplement (doi:10.1039/d3re00591g), 2024-01-01
Supplement: d3re00591g1.pdf [file d3re00591g1.pdf]

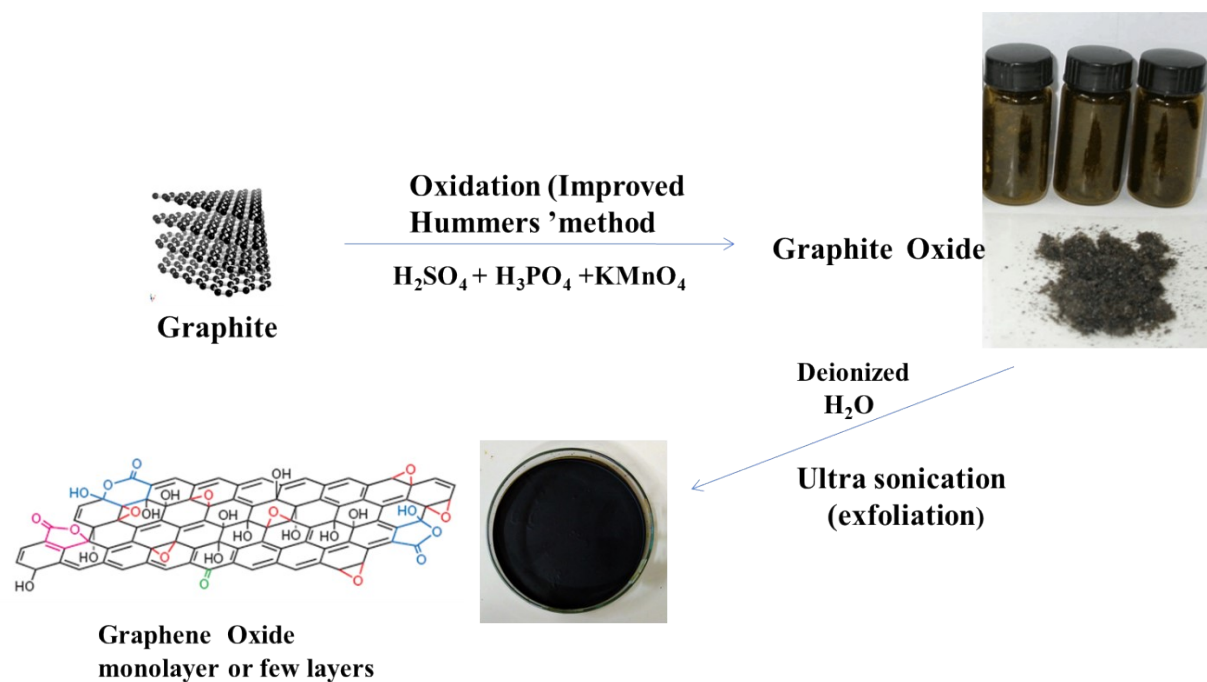

**Figure S1:** Preparation of Graphene oxide by improved Hummer's method (IHM)<sup>[1]</sup>

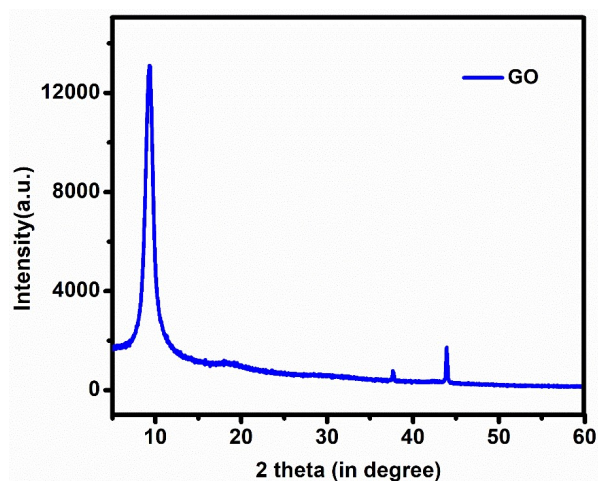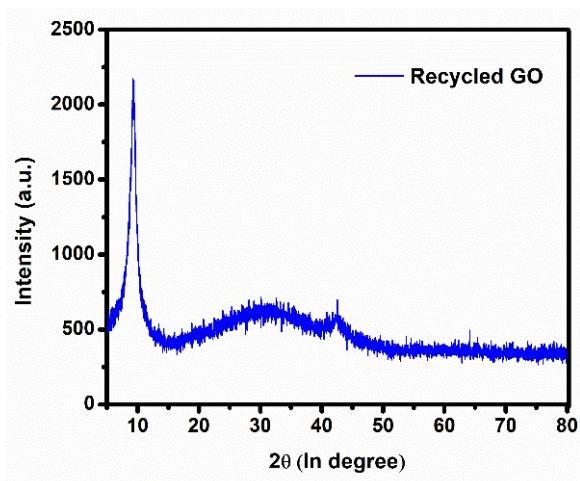

**Figure S2a.** X-ray diffraction pattern of GO

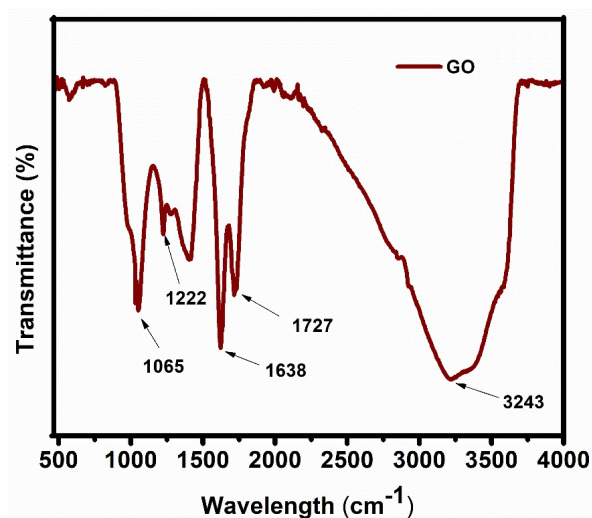

**Figure S2b.** X-ray diffraction pattern of recycled GO

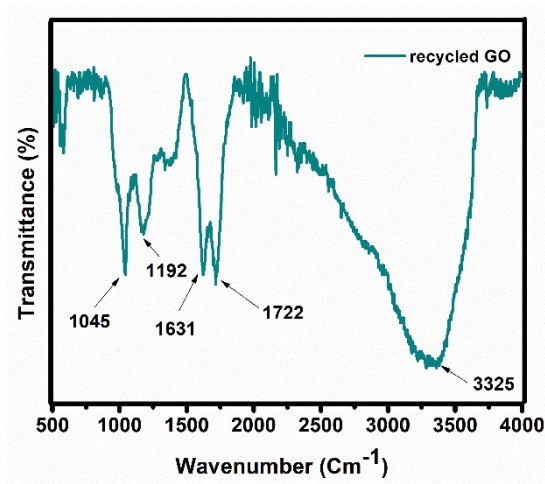

**Figure S2c.** FTIR spectra of GO

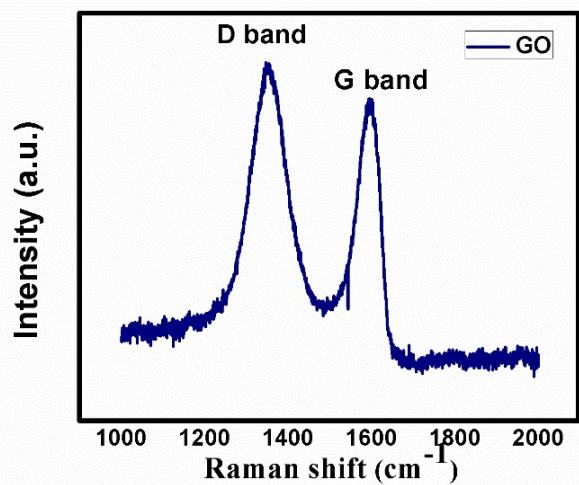

**Figure S2d** FTIR spectrum of Recycled GO

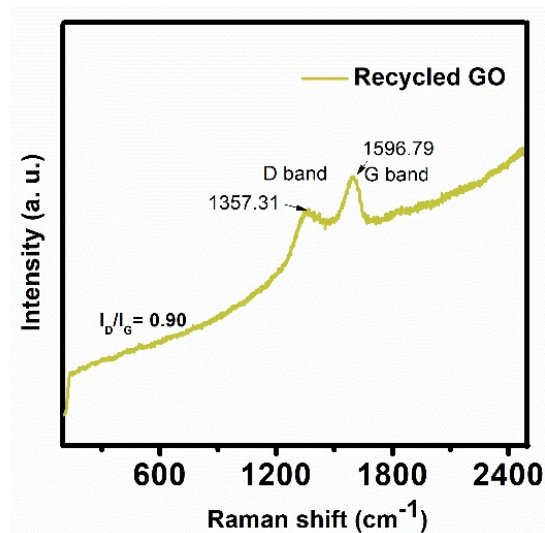

**Figure S2e.** Raman spectra of GO

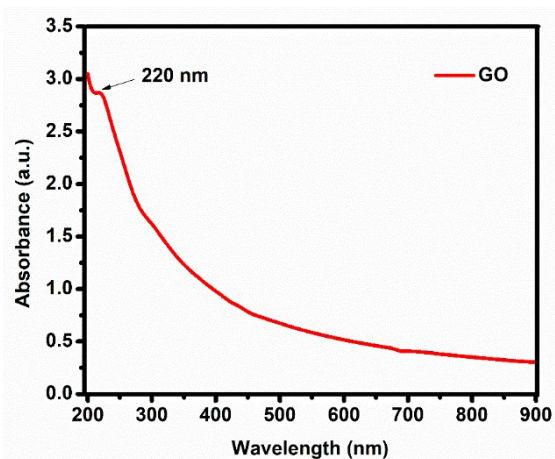

**Figure**

**S2f.** Raman spectra of recycled GO

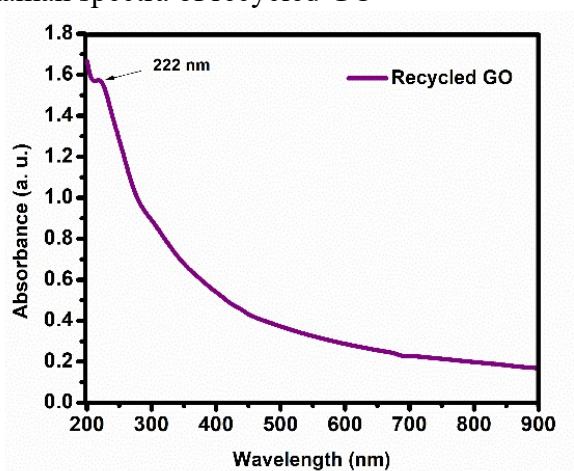

**Figure S2g.** UV–visible spectra of GO

**Figure S2h.** UV–visible spectrum of recycled GO

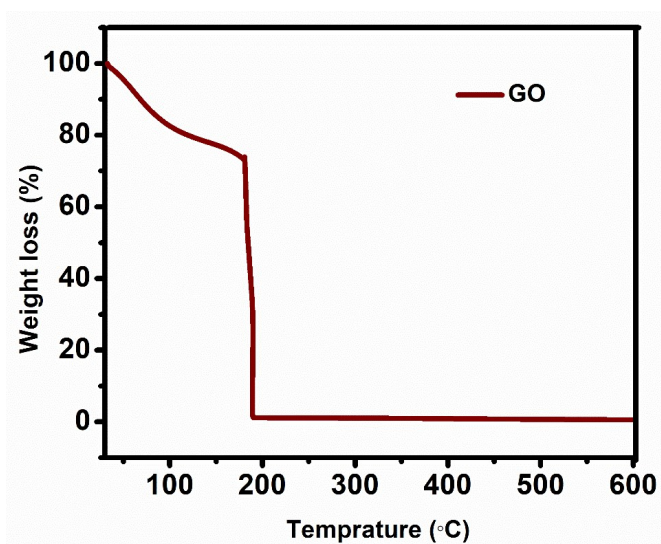

(TGA) of GO

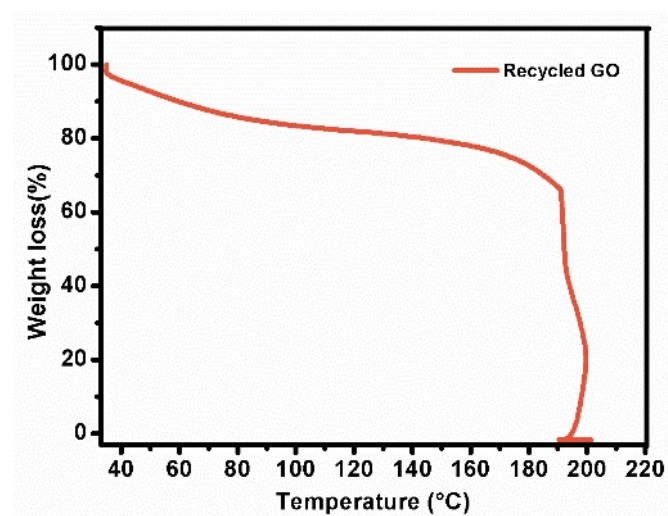

**Figure S2i.** Thermogravimetric analysis

**Figure S2j.** (TGA) of recycled GO

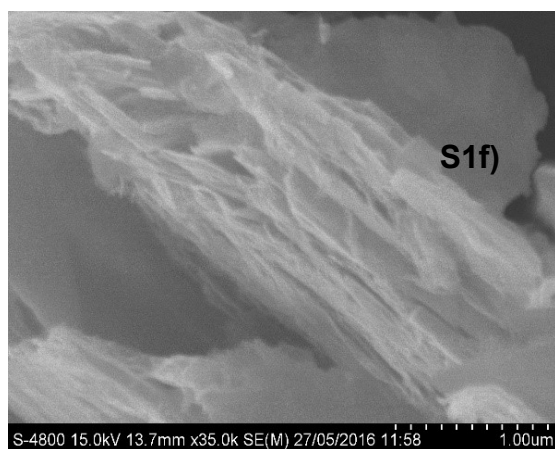



**Figure S2k.** Scanning electron microscope  
(SEM) images of GO, scale bar 1  $\mu\text{m}$ ;

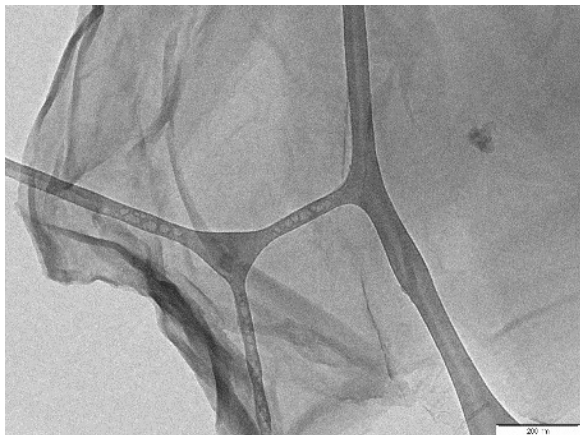

**Figure S2m.** TEM analysis of recycled GO

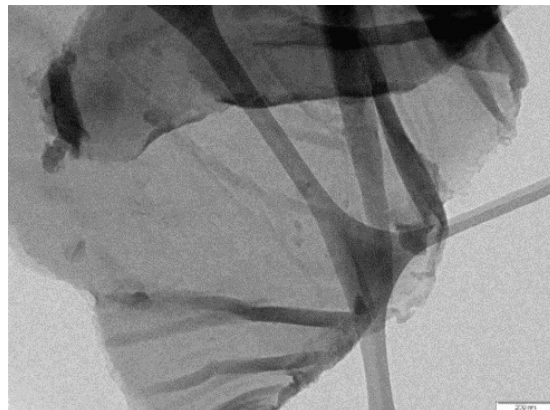

**Figure S2l.** TEM analysis of GO
